# Supplementary material for: Sequence selective photoinduced electron transfer of a pyrene–porphyrin dyad to DNA
Source: Royal Society of Chemistry journal article supplement (doi:10.1039/c8cp01870g), 2018-01-01
Supplement: c8cp01870g1.pdf [file c8cp01870g1.pdf]

## Sequence selective photoinduced electron transfer of a pyrene-porphyrin dyad to DNA

Myeong Eun Heo,<sup>a</sup> Young-Ae Lee,<sup>a</sup> Kazutaka Hirakawa,<sup>b</sup> Shigetoshi Okazaki,<sup>c</sup> Seog K. Kim,<sup>a,\*</sup> and Dae Won Cho<sup>d,\*</sup>

<sup>a</sup> Department of Chemistry, Yeungnam University, Gyeongsan, Gyeong-buk, 38541, Republic of Korea. E-mail: seogkim@yu.ac.kr

<sup>b</sup> Applied Chemistry and Biochemical Engineering Course, Department of Engineering, Graduate School of Integrated Science and Technology, Shizuoka University, Hamamatsu, Shizuoka, 432-8561, Japan. E-mail: hirakawa.kazutaka@shizuoka.ac.jp

<sup>c</sup> Preeminent Medical Photonics Education & Research Center, Hamamatsu University School of Medicine, Handayama 1-20-1, Higashi-ku, Hamamatsu, Shizuoka 431-3192, Japan. E mail: okazaki@hama-med.ac.jp

<sup>d</sup> Department of Advanced Materials Chemistry & Center for Photovoltaic Materials, Korea University, Sejong City, 30019, Republic of Korea. E-mail: dwcho@korea.ac.kr

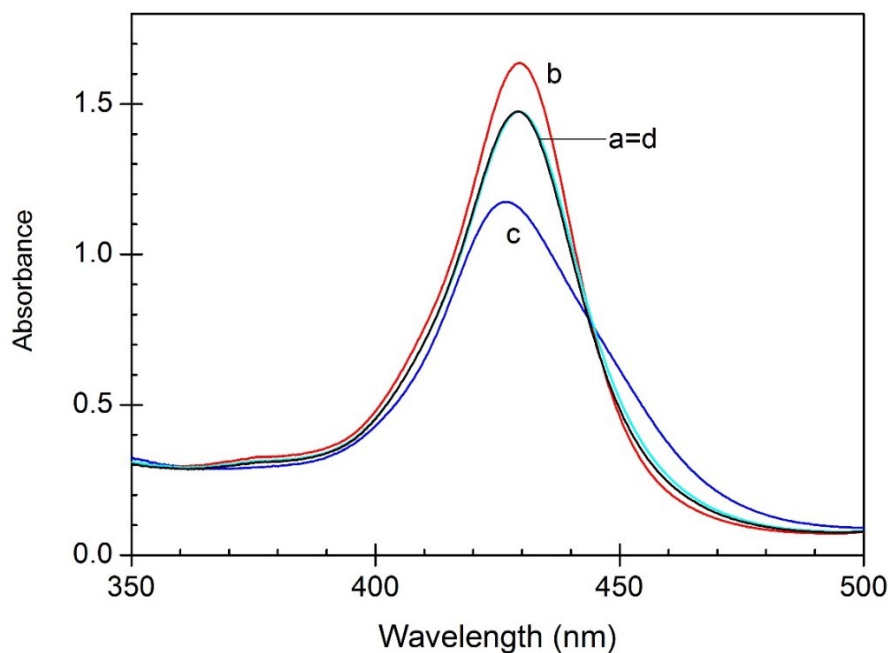

**Fig. S1.** Absorption spectrum of PyTMPyP associated with DNA (curve a, black), poly[d(A-T)<sub>2</sub>] (curve b, red) and poly[d(G-C)<sub>2</sub>] (curve c, blue). Combination of 0.75 × (curve a) + 0.25 × (curve c) is the same as curve a, and denoted by curve d. [polynucleotide] = 50 μM and [PyTMPyP] = 5 μM.

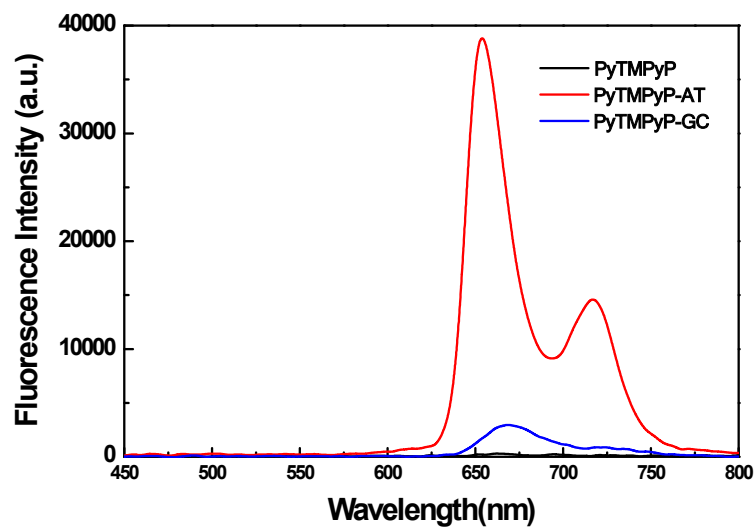

**Fig. S2.** Fluorescence emission spectrum of PyTMPyP (curve d, black dashed) and that bound to DNA (curve a, black, solid), poly[d(A-T)<sub>2</sub>] (curve b, red) and poly[d(G-C)<sub>2</sub>] (curve c, blue) upon excitation at 430 nm. The slit widths were 5 nm for both excitation and emission. [Polynucleotide] = 10  $\mu$ M and [PyTMPyP] = 0.5  $\mu$ M.

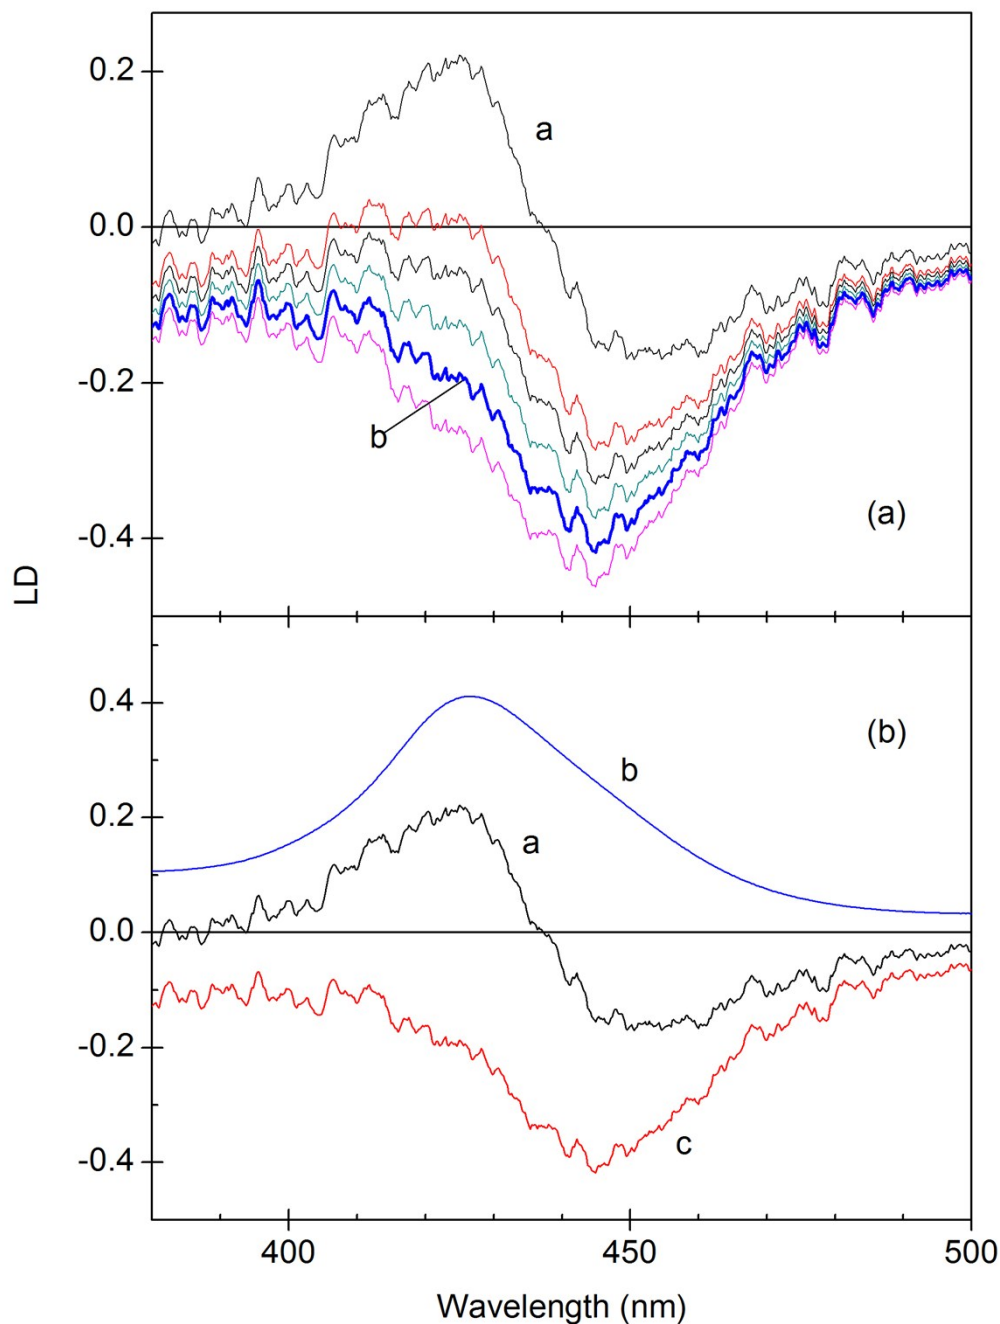

**Fig. S3.** (a) Step-wise reduction of absorption spectrum from measured LD spectrum (curve a) to obtain  $T_3(\lambda)$ , according to the equation (4) in the text. The curve b was selected to represent LD spectrum of  $T_3(\lambda)$ . The  $\kappa$  value varied between 0.15 and 3.5 with an increment of 0.5. (b) LD spectrum of the PyTMPyP-poly[d(G-C)<sub>2</sub>] complex resolved into the contributions from two transitions (curves b and c) in the Soret region. Curve a denotes measured LD.
